# Supplementary material
Source: bioRxiv or medRxiv preprint supplement (https://www.biorxiv.org/highwire/filestream/67707/field_highwire_adjunct_files/0/222349-1.pdf)
Supplement: Supplementary file [file 222349-1.pdf]

## Recurrently Mutated Genes Differ between Leptomeningeal and Solid Lung Cancer Brain Metastases

Yingmei Li\*<sup>1</sup>, Boxiang Liu\*<sup>2,3,4</sup>, Ian David Connolly\*<sup>1</sup>, Bina Wasunga Kakusa<sup>1</sup>,  
Wenying Pan<sup>5</sup>, Seema Nagpal<sup>6</sup>, Stephen B. Montgomery<sup>3,4</sup>, Melanie Hayden Gephart<sup>1</sup>

### Supplementary Information

Table S1. Patient cohort of LMD for WES

| <b>Sample ID</b> | <b>Age</b> | <b>Sex</b> | <b>Smoking Hx</b>                | <b>Primary tumor mutations</b>                  | <b>Tumor/Normal samples</b> |
|------------------|------------|------------|----------------------------------|-------------------------------------------------|-----------------------------|
| <b>LM1</b>       | 60         | F          | former smoker<br>(15 pack-years) | EGFR <sup>L858R</sup> , CTNNB1 <sup>S37C</sup>  | CSF cell                    |
| <b>LM2</b>       | 55         | F          | never smoker                     | Weak but reproducible EGFR exon 20 insertion    | CSF cell / blood            |
| <b>LM3</b>       | 26         | F          | never smoker                     | Not available                                   | CSF cell                    |
| <b>LM4</b>       | 72         | M          | never smoker                     | EGFR exon 19 deletion                           | CSF cell / saliva           |
| <b>LM5</b>       | 57         | F          | never smoker                     | EGFR <sup>L858R</sup>                           | CSF cell / saliva           |
| <b>LM6</b>       | 63         | M          | former smoker<br>(12 pack-years) | Not available                                   | CSF cell / blood            |
| <b>LM7</b>       | 58         | M          | never smoker                     | No known mutation                               | CSF cell                    |
| <b>LM8</b>       | 73         | F          | never smoker                     | EGFR exon 19 deletion,<br>TP53 <sup>R248W</sup> | CSF cell / blood            |

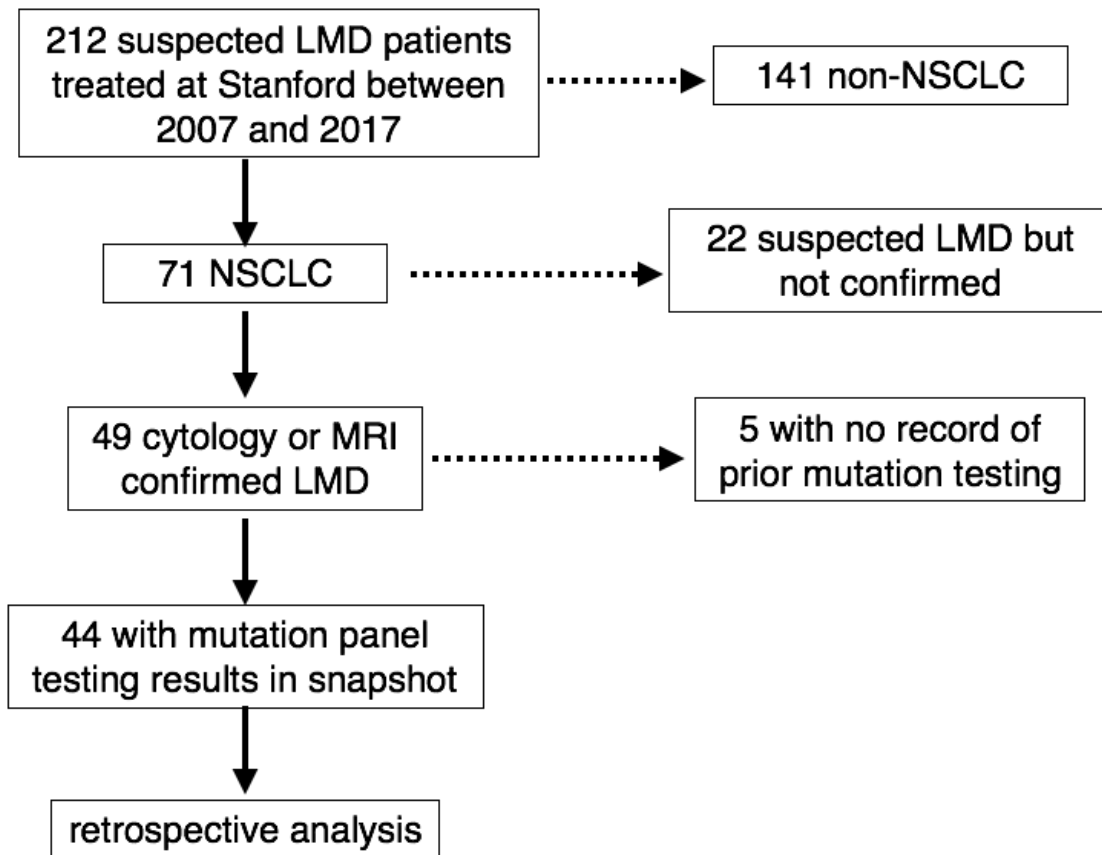

Figure S1. Flowchart of retrospective review cohort selection

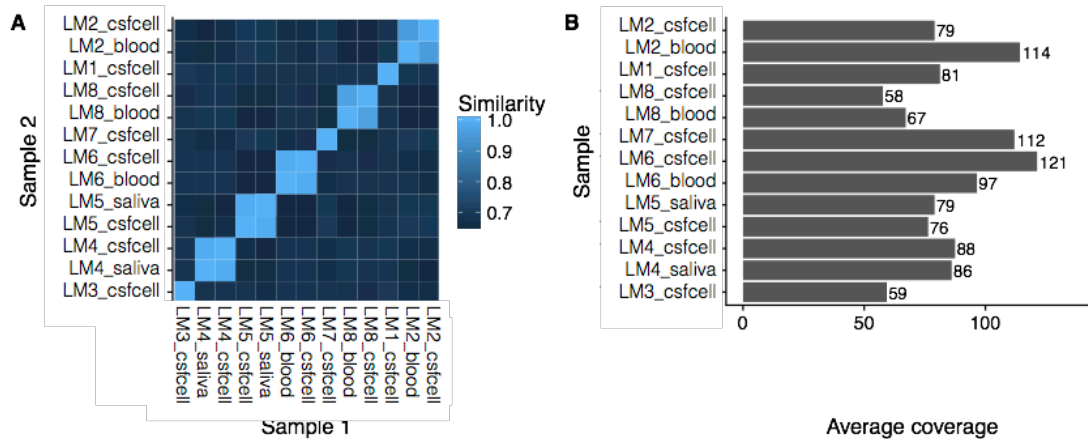

Figure S2. Sequencing QC for each LMD sample

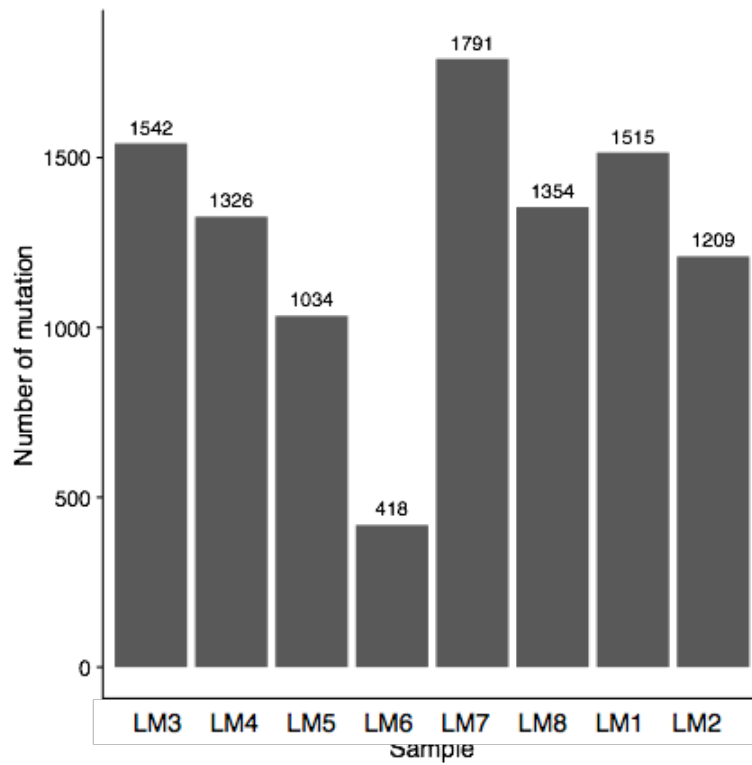

Figure S3. Mutations per samples

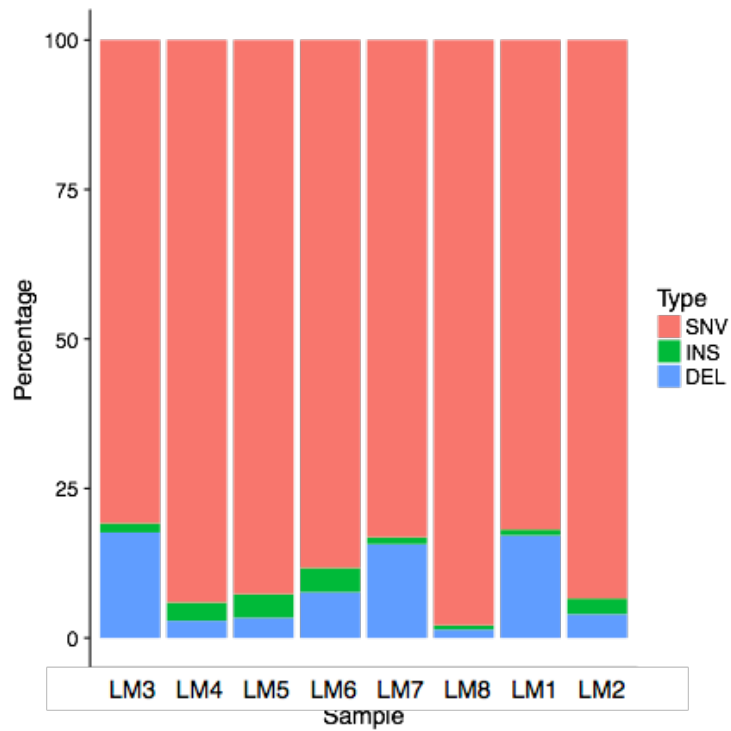

Figure S4. Mutation percentage by type

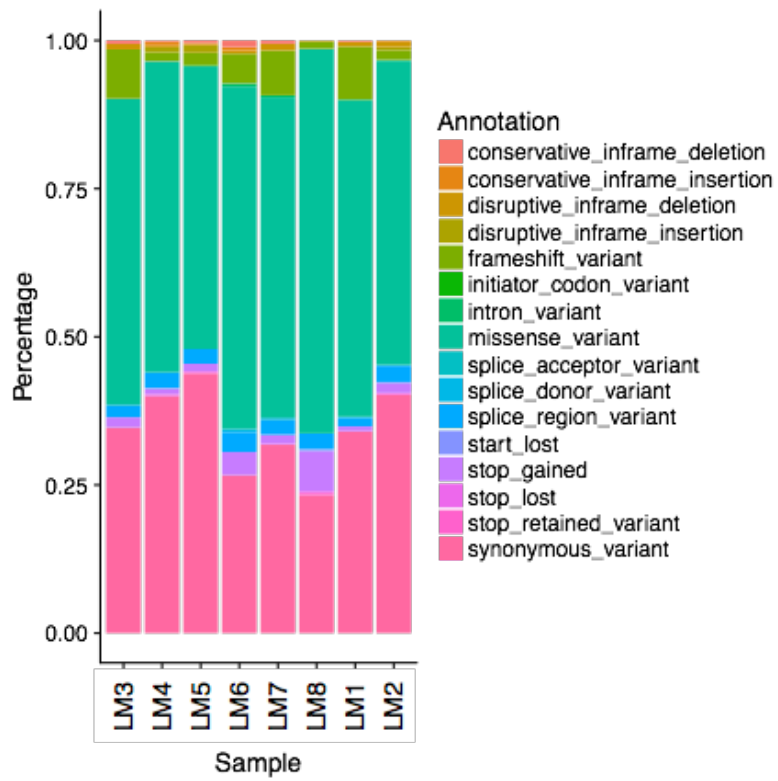

Figure S5. Mutation distribution

**Query**

| Protein Acc            | Position | AA <sub>1</sub> | AA <sub>2</sub> | Description                                                                                                                                                                                                                                                                                         |
|------------------------|----------|-----------------|-----------------|-----------------------------------------------------------------------------------------------------------------------------------------------------------------------------------------------------------------------------------------------------------------------------------------------------|
| <a href="#">P08581</a> | 1162     | H               | L               | Canonical; RecName: Full=Hepatocyte growth factor receptor; Short=HGF receptor; EC=2.7.10.1; AltName: Full=HGF/SF receptor; AltName: Full=Proto-oncogene c-Met; AltName: Full=Scatter factor receptor; Short=SF receptor; AltName: Full=Tyrosine-protein kinase Met; Flags: Precursor; Length: 1390 |

**Results**

**Prediction/Confidence** PolyPhen-2 v2.2.2r398

**HumDiv**

This mutation is predicted to be **PROBABLY DAMAGING** with a score of **1.000** (sensitivity: 0.00; specificity: 1.00)

**HumVar**

This mutation is predicted to be **PROBABLY DAMAGING** with a score of **0.999** (sensitivity: 0.09; specificity: 0.99)

**Details**

**Multiple sequence alignment** UniProtKB/UniRef100 Release 2011\_12 (14-Dec-2011)

```

QUERY      L T E G I I M K D F S H P N V L S L L G I Q L R S E G S P L V V L P Y M K H G D L R N F I R N E T H N P T V K D L I G F G L O V A R G M K Y L A S K K F
sp Q2QL89#1 L T E G I I M K D F S H P N V L S L L G I Q L R S E G S P L V V L P Y M K H G D L R N F I R N E T H N P T V K D L I G F G L O V A R G M K Y L A S K K F
sp Q2IBG7#1  L T E G I I M K D F S H P N V L S L L G I Q L R S E G S P L V V L P Y M K H G D L R N F I R N E T H N P T V K D L I G F G L O V A R G M K Y L A S K K F
sp Q2QLH6#1  L T E G I I M K D F S H P N V L S L L G I Q L R S E G S P L V V L P Y M K H G D L R N F I R N E T H N P T V K D L I G F G L O V A R G M K Y L A S K K F
sp Q2QLA9#1  L T E G I I M K D F S H P N V L S L L G I Q L R S E G S P L V V L P Y M K H G D L R N F I R N E T H N P T V K D L I G F G L O V A R G M K Y L A S K K F
sp Q2QLE0#1  L T E G I I M K D F S H P N V L S L L G I Q L R S E G S P L V V L P Y M K H G D L R N F I R N E T H N P T V K D L I G F G L O V A R G M K Y L A S K K F
sp Q769I5#1  L T E G I I M K D F S H P N V L S L L G I Q L R S E G S P L V V L P Y M K H G D L R N F I R N E T H N P T V K D L I G F G L O V A R G M E Y L A S K K F
sp Q09YK0#1  L T E G I I M K D F S H P N V L S L L G I Q L R S E G S P L V V L P Y M K H G D L R N F I R N E T H N P T V K D L I G F G L O V A R G M E Y L A S K K F
sp A0M8S8#1  L T E G I I M K D F S H P N V L S L L G I Q L R S E G S P L V V L P Y M K H G D L R N F I R N E T H N P T V K D L I G F G L O V A R G M K Y L A S K K F
sp Q09YI9#1  L T E G I I M K D F S H P N V L S L L G I Q L R S E G S P L V V L P Y M K H G D L R N F I R N E T H N P T V K D L I G F G L O V A R G M E Y L A S K K F
sp Q75ZY9#1  L T E G I I M K D F S H P N V L S L L G I Q L R S E G S P L V V L P Y M K H G D L R N F I R N E T H N P T V K D L I G F G L O V A R G M K Y L A S K K F
sp G1L3E0#1  L T E G I I M K D F S H P N V L S L L G I Q L R S E G S P L V V L P Y M K H G D L R N F I R N E T H N P T V K D L I G F G L O V A R G M K Y L A S K K F
sp UPI0001DEA724#1 L T E G I I M K D F S H P N V L S L L G I Q L R S E G S P L V V L P Y M K H G D L R N F I R N E T H N P T V K D L I G F G L O V A R G M K Y L A S K K F
sp Q09YN5#1  L T E G I I M K D F S H P N V L S L L G I Q L R S E G S P L V V L P Y M K H G D L R N F I R N E T H N P T V K D L I G F G L O V A R G M K Y L A S K K F
sp UPI00022F4250#1 L T E G I I M K D F S H P N V L S L L G I Q L R S E G S P L V V L P Y M K H G D L R N F I R N E T H N P T V K D L I G F G L O V A R G M K Y L A S K K F
sp Q07E24#1  L T E G I I M K D F S H P N V L S L L G I Q L R S E G S P L V V L P Y M K H G D L R N F I R N E T H N P T V K D L I G F G L O V A R G M K Y L A S K K F
sp Q108U6#1  L T E G I I M K D F S H P N V L S L L G I Q L R S E G S P L V V L P Y M K H G D L R N F I R N E T H N P T V K D L I G F G L O V A R G M K Y L A S K K F
sp G3T807#1  L T E G I I M K D F S H P N V L S L L G I Q L R S E G S P L V V L P Y M K H G D L R N F I R N E T H N P T V K D L I G F G L O V A R G M K Y L A S K K F
-- G07A00#1  L T E G I I M K D F S H P N V L S L L G I Q L R S E G S P L V V L P Y M K H G D L R N F I R N E T H N P T V K D L I G F G L O V A R G M K Y L A S K K F

```

Shown are 75 amino acids surrounding the mutation position (marked with a black box). An interactive version of the complete alignment is [also available](#).

Figure S6 MET p.His1180Leu mutation

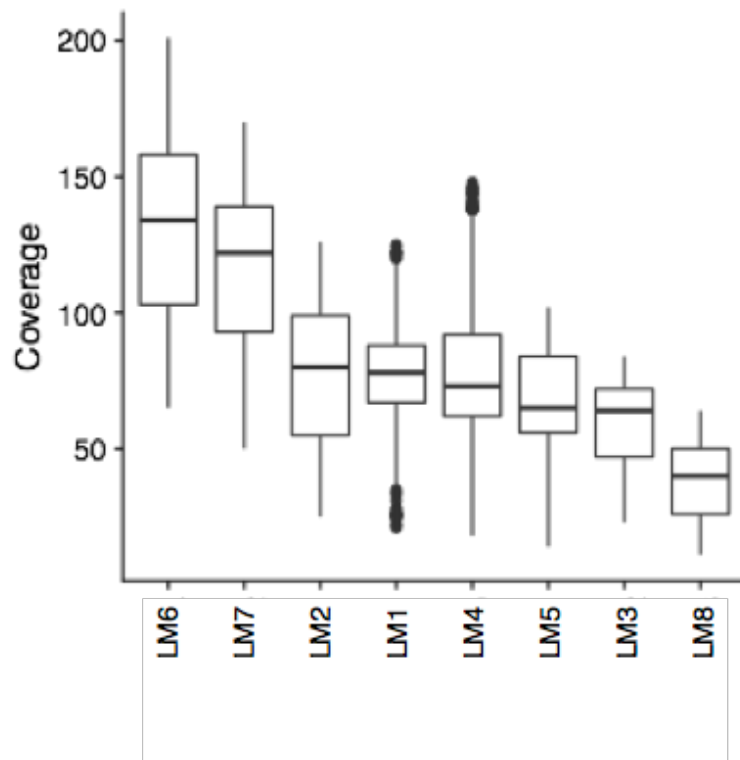

Figure. S7 WES coverage of *KRAS* gene
